# Supplementary material
Source: PubMed Central journal article supplement (PMC5272872)
Supplement: NIHMS810163-supplement-supplementary.pdf [file NIHMS810163-supplement-supplementary.pdf]

## **Supplementary Materials**

### **A Breathing-based Meditation Intervention for Patients with Major Depressive Disorder Following Inadequate Response to Antidepressants: A Randomized Pilot Study**

Anup Sharma MD PhD<sup>1\*</sup>, Marna S. Barrett PhD<sup>1</sup>, Andrew J. Cucchiara PhD<sup>2</sup>, Nalaka S. Gooneratne MD<sup>3</sup>, and Michael E. Thase MD<sup>1</sup>  
Departments of Psychiatry<sup>1</sup>, Biostatistics and Epidemiology<sup>2</sup>, Division of Geriatric Medicine<sup>3</sup>  
University of Pennsylvania, Philadelphia, PA 19104

#### **Contents of Supplementary Materials:**

##### **Supplementary Table**

Supplementary eTable 1: SKY Practices During the First Phase of Intervention

Supplementary eTable 2: SKY Home Practice

## Supplementary Tables.

| <b>Supplementary eTable 1. SKY Practices During the First Phase of Intervention</b> |                                    |                                                 |                                       |
|-------------------------------------------------------------------------------------|------------------------------------|-------------------------------------------------|---------------------------------------|
| <b>Day</b>                                                                          | <b>Practice</b>                    | <b>Breath Rate<br/>(cycles/min)<sup>a</sup></b> | <b>Duration (minutes)<sup>b</sup></b> |
| 1                                                                                   | Yoga Postures                      | n/a                                             | 20                                    |
|                                                                                     | 3-stage victory breathing          | 3-4                                             | 7                                     |
|                                                                                     | Bellows breathing                  | 30-40                                           | 3                                     |
|                                                                                     | Sitting meditation                 | n/a                                             | 20                                    |
| 2                                                                                   | Yoga Postures                      | n/a                                             | 20                                    |
|                                                                                     | 3-stage victory breathing          | 3-4                                             | 7                                     |
|                                                                                     | Bellows breathing                  | 30-40                                           | 3                                     |
|                                                                                     | Sudarshan Kriya cyclical breathing | 10-150                                          | 50                                    |
| 3                                                                                   | Yoga Postures                      | n/a                                             | 20                                    |
|                                                                                     | 3-stage victory breathing          | 3-4                                             | 7                                     |
|                                                                                     | Bellows breathing                  | 30-40                                           | 3                                     |
|                                                                                     | Sudarshan Kriya cyclical breathing | 10-150                                          | 50                                    |
| 4                                                                                   | Yoga Postures                      | n/a                                             | 20                                    |
|                                                                                     | 3-stage victory breathing          | 3-4                                             | 7                                     |
|                                                                                     | Bellows breathing                  | 30-40                                           | 3                                     |
|                                                                                     | Sudarshan Kriya cyclical breathing | 10-150                                          | 15                                    |
|                                                                                     | Sitting meditation                 | n/a                                             | 20                                    |
| 5                                                                                   | Yoga Postures                      | n/a                                             | 20                                    |
|                                                                                     | 3-stage victory breathing          | 3-4                                             | 7                                     |
|                                                                                     | Bellows breathing                  | 30-40                                           | 3                                     |
|                                                                                     | Sudarshan Kriya cyclical breathing | 10-150                                          | 15                                    |
|                                                                                     | Sitting meditation                 | n/a                                             | 20                                    |
| 6                                                                                   | Yoga Postures                      | n/a                                             | 20                                    |
|                                                                                     | 3-stage victory breathing          | 3-4                                             | 7                                     |
|                                                                                     | Bellows breathing                  | 30-40                                           | 3                                     |
|                                                                                     | Sudarshan Kriya cyclical breathing | 10-150                                          | 15                                    |
|                                                                                     | Sitting meditation                 | n/a                                             | 20                                    |

<sup>a</sup> Approximate range

<sup>b</sup> Practice duration includes rest periods

**Supplementary eTable 2. SKY Home Practice**

| <b>Practice</b>                    | <b>Breath Rate (cycles/min)<sup>a</sup></b> | <b>Duration (minutes)<sup>b</sup></b> |
|------------------------------------|---------------------------------------------|---------------------------------------|
| 3-stage victory breathing          | 3-4                                         | 7                                     |
| Bellows breathing                  | 30-40                                       | 3                                     |
| Sudarshan Kriya cyclical breathing | 10-150                                      | 10                                    |
| Rest period                        | n/a                                         | 5                                     |

<sup>a</sup> Approximate range

<sup>b</sup> Practice duration includes rest periods
